# Lower Urinary Tract Symptoms (LUTS) as a Risk Factor for Depressive Symptoms in Elderly Men: Results from a Large Prospective Study in Southern Chinese Men

Roger Y. Chung<sup>1</sup>, Jason C. S. Leung<sup>2</sup>, Dicken C. C. Chan<sup>1</sup>, Jean Woo<sup>3</sup>, Carmen K. M. Wong<sup>1</sup>, Samuel Y. S. Wong<sup>1\*</sup>

**1** School of Public Health and Primary Care, The Chinese University of Hong Kong, Hong Kong SAR, China, **2** Jockey Club Centre for Osteoporosis Care and Control, The Chinese University of Hong Kong, Hong Kong SAR, China, **3** Department of Medicine and Therapeutics, The Chinese University of Hong Kong, Hong Kong SAR, China

## Abstract

A cross-sectional relationship between lower urinary tract symptoms (LUTS) and depressive symptoms was previously reported among Southern Chinese men; however, the temporal relationship was unclear. Our objective is to evaluate the temporal relationship between moderate to severe lower urinary tract symptoms and clinically significant depressive symptoms in elderly Chinese men aged 65 in a prospective manner. In a prospective cohort of 2,000 Chinese men aged 65 to 92 years in Hong Kong, we studied the association of having moderate to severe LUTS at baseline and having clinically relevant depressive symptoms at year 2 follow-up. After excluding men with prostate or bladder cancer or surgery ( $n = 20$ ) and lost to follow-up ( $n = 254$ ), data on 1,726 subjects were analyzed. LUTS were measured by the International Prostate Symptom score; and clinically relevant depressive symptoms were measured by the Geriatric Depression Scale. The multiple logistic regressions showed that the presence of moderate-to-severe LUTS at baseline were significantly associated with increased risk for being depressed at two-year follow-up, with adjustments for demographic, lifestyle, medical factors, weight status and stressful life events (OR = 2.97; CI: 1.70–5.20). Association remained significant with additional adjustments for baseline GDS score (OR = 1.88; CI: 1.03–3.41). LUTS are important risk factors in predicting the presence of clinically relevant depressive symptoms. In elderly men, increased awareness and possible screening are needed to detect the increased risk of clinically relevant depressive symptoms.

**Citation:** Chung RY, Leung JCS, Chan DCC, Woo J, Wong CKM, et al. (2013) Lower Urinary Tract Symptoms (LUTS) as a Risk Factor for Depressive Symptoms in Elderly Men: Results from a Large Prospective Study in Southern Chinese Men. *PLoS ONE* 8(9): e76017. doi:10.1371/journal.pone.0076017

**Editor:** Yu-Kang Tu, National Taiwan University, Taiwan

**Received:** June 14, 2013; **Accepted:** August 16, 2013; **Published:** September 30, 2013

**Copyright:** © 2013 Chung et al. This is an open-access article distributed under the terms of the Creative Commons Attribution License, which permits unrestricted use, distribution, and reproduction in any medium, provided the original author and source are credited.

**Funding:** This work was supported by the Health and Health Services Research Fund (Grant no. 02030661), Food and Health Bureau, the Hong Kong Special Administrative Region. URL of funder's website: [http://www.fhb.gov.hk/grants/english/funds/funds\\_hmrf/funds\\_hmrf\\_abt/funds\\_hmrf\\_abt.html](http://www.fhb.gov.hk/grants/english/funds/funds_hmrf/funds_hmrf_abt/funds_hmrf_abt.html). The funders had no role in study design, data collection and analysis, decision to publish, or preparation of the manuscript.

**Competing Interests:** The authors have declared that no competing interests exist.

\* E-mail: yeungshanwong@cuhk.edu.hk

## Introduction

It has been established that depressive symptoms or depression are related to a number of chronic medical conditions including cardiovascular diseases [1], chronic obstructive pulmonary diseases (COPD) [2], congestive heart diseases [3] and other debilitating conditions. Results from these previous studies showed that the presence of chronic medical conditions was associated with increased risk of having clinically relevant depressive symptoms or depression. In terms of public health impact, it was shown that the presence of depressive symptoms among people with chronic conditions are associated with increased disability, morbidity and mortality [3–5].

Lower urinary tract symptoms (LUTS) are common chronic conditions in elderly men. Previous large epidemiological studies showed that the prevalence of LUTS ranges from 40% to 80% in men aged over 50, and increases with increasing age [6,7]. Studies have also shown a decreased quality of life in men, poorer role functioning, and poorer emotional outcomes associated with LUTS [8–14]. Although the prevalence of LUTS is high and the impact is significant, few prospective studies have been carried out to evaluate the association between LUTS and depressive

symptoms which are important to delineate the temporal and causal relationships between LUTS and clinically relevant depressive symptoms.

We previously reported the relationship between LUTS and clinically relevant depressive symptoms using data from a cross-sectional study [15]. However, the temporality of the relationship has not been established. The current study was conducted to delineate the temporal relationship between having LUTS and depressive symptoms. Moreover, the relationship between LUTS and clinically relevant depressive symptoms was studied among other demographic, lifestyle and medical factors.

## Materials and Methods

### Ethics Statement

This study was approved by the Clinical Research Ethics Committee of the Chinese University of Hong Kong, and all the study participants gave written informed consent.

## Study Subjects

The methodology of this study was described previously [16]. In brief, 2,000 Chinese men who were 65 years and older were recruited for this study. To be eligible, subjects had to be able to walk independently. Stratified sampling was adopted in order to have around 33% of subjects in each of the following age groups: 65–69, 70–74,  $\geq 75$  years. Recruitment notices were placed in housing estates and community centers for the elderly in Hong Kong. Subjects were invited to the research center for interviews and physical examination. A comprehensive standardized questionnaire was used to collect the information needed at baseline. After two years (i.e., at Year 2), the subjects were then invited again for a second visit to answer repeated questions for measuring clinically relevant depressive symptoms. Informed consent was obtained from all subjects.

For this analysis, men with a history of bladder or prostate cancer or surgery for bladder cancer were excluded.

## Questionnaire

Subjects were interviewed from August 2001 to February 2003 using a standardized, structured questionnaire which covered the following aspects. They were then followed up after two years with some of the questions asked at baseline repeated. Details of the questionnaire items are listed below.

**Demographic characteristics.** Information on age, residential address, place of origin, education levels and occupation was obtained.

**Medical conditions and medication use.** Information on subjects' medical history was obtained based on self-reports of medical conditions. Subjects were asked to bring in all medications for identification.

**Lower Urinary Tract Symptoms (LUTS).** Each subject was asked to grade the severity of LUTS using the Chinese version of the International Prostatic Symptoms Score (IPSS) [17] for LUTS. Seven questions of the IPSS assess the severity of the symptoms. These symptoms include nocturia, frequency, urgency, intermittency, weak stream, incomplete emptying and straining. The IPSS is the sum of all seven scores with a range of 0 to 35. A score of 1 or more defined a respondent to have that particular symptom.

Using standard cut-points for symptom severity, men were defined as having severe LUTS if they scored 20 or more on the IPSS. They were defined as having moderate LUTS if they scored from 8 to 19. Mild LUTS were defined as having a score of 7 or less.

**Clinically relevant depressive symptoms.** Questions on depression were asked both at baseline and at Year 2. Depression was diagnosed by a trained interviewer during face-to-face interviews, using a validated 15-item Chinese version of the Geriatric Depression Scale (GDS), with depression being defined as scoring 8 or above [18]. The use of the short form was found to be a useful measure and screening tool for geriatric depression due to the elderly tendency to fatigue with long questionnaire. The GDS short form was found to be a highly reliable (reliability coefficient of 0.90) and valid screening device (sensitivity of 96.3% and specificity of 87.5%) for assessing geriatric depression in Hong Kong [18].

**Cigarette smoking and alcohol consumption.** Cigarette smoking and alcohol consumption were based on self-report using validated methods [19]. Information on the duration and dosage of past and current use of cigarettes, cigars and pipes were obtained. Smoking status was defined as former smoker (at least 100 cigarettes smoked in a lifetime), current smoker, and those who never smoke. For current smokers, the number of cigarettes

smoked per day over the previous 12 months was categorized as  $<20$  or  $\geq 20$ .

For alcohol consumption, subjects were asked to report their daily frequency of intake of alcohol and other beverages in portion sizes. They were also asked to report on how many days of the week they consumed alcohol. Drinking status was categorized as never, former or current drinker. Current drinkers were defined as those who drank at least 12 drinks of beer, wine (including Chinese wine), or liquor over the previous 12 months. For estimation of total alcohol intake in grams per day, servings of specified types of alcoholic beverages were multiplied by the number of grams per serving. A standard drink was one that contained 10 grams of alcohol.

**Physical activity.** Physical activity was measured by the validated Physical Activity Scale for the Elderly Questionnaire (PASE) [20]. It measured the level of physical activity in individuals aged 65 years and older. The instrument is a self-report interview-based measure designed to capture and assess occupational, household, and leisure activities typically performed by older adults. PASE was adapted for the Hong Kong Chinese population by adding activity items that were popular among the local elderly.

## Statistical Analysis

Crude relative risk and corresponding 95% confidence intervals were calculated for examination of associations between moderate to severe LUTS at baseline and clinically relevant depressive symptoms at Year 2. Crude relative risk and its 95% CI for other potential confounding factors for this relationship were also calculated. These potential confounders included socio-demographic information (mean-centered age, education, marital status), lifestyle information (cigarette smoking, alcohol consumption and physical activity), medical conditions (cardiovascular disease, COPD, diabetes mellitus, stroke, BMI) and stressful life events that have been shown to be associated with depressive symptoms in the literature. Variables found to be associated with clinically relevant depressive symptoms in the initial uni-variate analyses were put into a multiple logistic regression model. Relative risk (95% CIs) for demographic, lifestyle, medical factors and the presence of moderate to severe LUTS in relation to having clinically relevant depressive symptoms were calculated by multiple logistic regression.

All statistical analyses were performed using the statistical package SAS, version 8.02 (SAS Institute, Inc., Cary, North Carolina).

## Results

### Baseline Characteristics

The results of the baseline demographics are presented in Table 1. Of the 2,000 men recruited, 20 were excluded as they had either a history of bladder surgery or had a history of bladder or prostate cancer. 254 subjects were lost to follow-up at Year 2 with a retention rate of 87%. After exclusion, 1,726 subjects remained for analyses (Figure 1).

At baseline, the majority (88.5%) of men were married or living with a partner. More than half (59.4%) had only a primary or lower education. Overall, 11.4% were current smokers with about half (52.3%) having a past history of smoking. Also, most subjects (76.0%) were non-drinkers.

The overall mean (and its standard deviation) GDS score was 2.8 (2.7) at baseline, and 1.8 (2.4) at Year 2. Moreover, the mean (and its standard deviation) GDS score for the controls and the

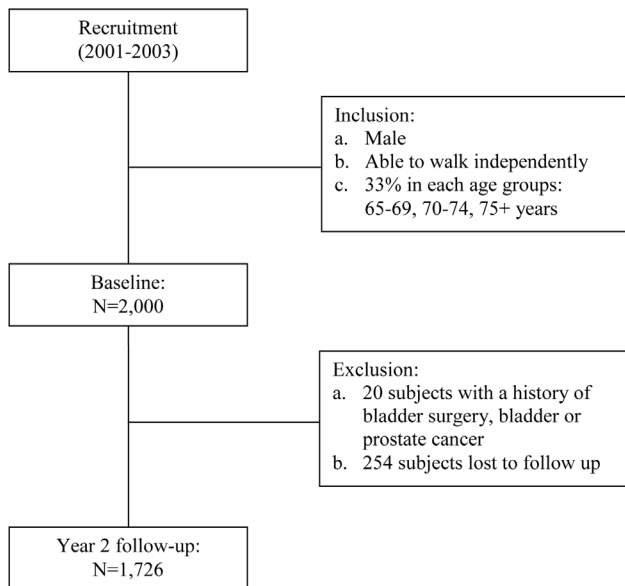

**Figure 1. Flow of the study subjects.**  
doi:10.1371/journal.pone.0076017.g001

depressed cases was 2.7 (2.6) and 6.8 (3.4), respectively at baseline, and 1.5 (1.8) and 9.6 (1.7), respectively at Year 2.

### LUTS and Clinically Relevant Depressive Symptoms

The associations between lifestyle, medical and socio-demographic factors and the presence of clinically relevant depressive symptoms are shown in Table 2. In the univariate analysis, the presence of moderate to severe LUTS at baseline was associated with increased risk of having clinically relevant depressive symptoms at Year 2 (OR = 3.25; CI: 1.91–5.52). Also, having a history of coronary heart disease, COPD and diabetes were associated with increased risk of having clinically relevant depressive symptoms (OR = 2.04; CI: 1.15–3.62 for having a history of coronary heart disease; OR = 1.96; CI: 1.03–3.74 for having a history of COPD; and OR = 1.87; CI: 1.03–3.39 for having diabetes). In the multivariable analysis after adjusting for other co-variables and baseline clinically relevant depressive symptoms, having moderate to severe LUTS at baseline (OR = 2.50; CI: 1.41–4.42) still remained to be significantly associated with increased risk of having clinically relevant depressive symptoms at Year 2. Being depressed at baseline (OR = 5.61; CI: 3.07–10.25), having diabetes (OR = 2.01; CI: 1.04–3.88), and having more than one stressful life events (OR = 2.43; CI: 1.41–4.20) were also independently associated with increased risk of having clinically relevant depressive symptoms at Year 2.

### Discussion

LUTS have been shown to significantly affect the daily functioning of men; however, to our knowledge, this is the first prospective study in Asia that has demonstrated a temporal association between the presence of moderate-to-severe LUTS at baseline and increased risk of clinically relevant depressive symptoms after a period of 2 years, adjusting for other confounders including demographic, lifestyle, medical factors, weight status, stressful life events as well as baseline depressive symptoms.

**Table 1. Subjects' characteristics at baseline (n = 1,726).**

| Variable                                               | Mean (SD)/N (%) |
|--------------------------------------------------------|-----------------|
| Age (year)                                             | 72.1 (4.8)      |
| Geriatric Depression Scale (score)                     | 2.8 (2.7)       |
| Geriatric Depression Scale (score) at year 2 follow-up | 1.8 (2.4)       |
| Lower urinary tract symptoms                           |                 |
| None (0)                                               | 90 (5.2%)       |
| Mild (1–7)                                             | 950 (55.0%)     |
| Moderate (8–19)                                        | 565 (32.7%)     |
| Severe (20–35)                                         | 121 (7.0%)      |
| Marital status                                         |                 |
| Married or living in a married-like relationship       | 1,528 (88.5%)   |
| Widowed                                                | 131 (7.6%)      |
| Separated                                              | 19 (1.1%)       |
| Divorced                                               | 14 (0.8%)       |
| Single, never married                                  | 34 (2.0%)       |
| Education                                              |                 |
| Primary or below                                       | 1,026 (59.4%)   |
| Secondary/Matriculation                                | 457 (26.5%)     |
| University or above                                    | 243 (14.1%)     |
| PASE                                                   |                 |
| <60.4                                                  | 399 (23.1%)     |
| 60.4–<89.3                                             | 439 (25.4%)     |
| 89.3–<124.6                                            | 435 (25.2%)     |
| 124.6 or above                                         | 453 (26.3%)     |
| CHD                                                    | 267 (15.5%)     |
| COPD                                                   | 187 (10.8%)     |
| Diabetes                                               | 249 (14.4%)     |
| Current smoker                                         | 197 (11.4%)     |
| Drink >12 alcoholic drinks in past 12 m                | 415 (24.0%)     |
| Beta-blocker                                           | 270 (15.6%)     |
| Anti-depressants                                       | 8 (0.5%)        |
| BMI                                                    |                 |
| Normal (18.5–<23)                                      | 654 (37.9%)     |
| Overweight or Obese (23 or above)                      | 985 (57.1%)     |
| Underweight (<18.5)                                    | 87 (5.0%)       |
| Number of stressful life event >1 at year 2 follow-up  | 393 (22.8%)     |

doi:10.1371/journal.pone.0076017.t001

A recent Japanese study investigated the link between LUTS and depression, but found no significant association between the two in contrast to the present study [21]. This is probably due to small sample size and selection bias of that study, because recruitments were only done on patients with late-onset hypogonadism, of which LUTS is not a typical symptom according to the guidelines set forth by the International Society for the Study of the Aging Male. Nevertheless, some other non-Asian studies have shown similar results. In a recent large nested case-control study, Coyne and colleagues [22] showed that overactive bladder, incontinence and other LUTS were associated with multidimensional impact on patients that included decreased quality of life, greater symptom bother, decreased enjoyment of sexual activity and higher rates of depression. In another study, Fitzgerald and colleagues [23] showed that all urologic symptoms were signifi-

**Table 2.** Crude odds ratio (univariate logistic regression) and adjusted odds ratio (multiple logistic regression) for having clinically relevant depressive symptoms at Year 2 follow-up in relation to demographic, lifestyle, medical factors, weight status, stressful life events and baseline depressive symptoms.

| Variable                                              | Percentage (%)         |                       | Crude Odds ratio<br>(95% CI) | Adj. Odds ratio<br>(95% CI) |
|-------------------------------------------------------|------------------------|-----------------------|------------------------------|-----------------------------|
|                                                       | Controls<br>(N = 1662) | Depressed<br>(N = 64) |                              |                             |
| Lower urinary tract symptoms                          |                        |                       |                              |                             |
| None-Mild (0–7)                                       | 61.3                   | 32.8                  | 1                            | 1                           |
| Moderate-Severe (8–35)                                | 38.7                   | 67.2                  | <b>3.25 (1.91, 5.52)</b>     | <b>2.50 (1.41, 4.42)</b>    |
| Age (year)                                            | 72.1 (4.8)             | 72.6(4.8)             | 1.02 (0.97, 1.07)            | 0.99 (0.94, 1.05)           |
| Marital status                                        |                        |                       |                              |                             |
| Married or living in a married-like relationship      | 88.7                   | 84.4                  | 1                            | 1                           |
| Widowed                                               | 7.6                    | 7.8                   | 1.08 (0.43, 2.76)            | 0.96 (0.34, 2.66)           |
| Separated                                             | 1.0                    | 3.1                   | 3.21 (0.72, 14.25)           | 4.00 (0.83, 19.21)          |
| Divorced                                              | 0.8                    | 1.6                   | 2.10 (0.27, 16.34)           | 1.17 (0.11, 12.45)          |
| Single, never married                                 | 1.9                    | 3.1                   | 1.71 (0.40, 7.30)            | 0.83 (0.17, 4.15)           |
| Education                                             |                        |                       |                              |                             |
| Primary or below                                      | 59.2                   | 65.6                  | 1                            | 1                           |
| Secondary/Matriculation                               | 26.6                   | 23.4                  | 0.80 (0.44, 1.45)            | 0.90 (0.48, 1.70)           |
| University or above                                   | 14.2                   | 10.9                  | 0.70 (0.31, 1.57)            | 0.87 (0.37, 2.09)           |
| PASE                                                  |                        |                       |                              |                             |
| <60.4                                                 | 22.4                   | 40.6                  | 1                            | 1                           |
| 60.4–<89.3                                            | 25.9                   | 12.5                  | <b>0.27 (0.12, 0.60)</b>     | <b>0.31 (0.14, 0.72)</b>    |
| 89.3–<124.6                                           | 25.3                   | 21.9                  | <b>0.48 (0.25, 0.93)</b>     | 0.53 (0.26, 1.08)           |
| 124.6 or above                                        | 26.3                   | 25.0                  | <b>0.53 (0.28, 0.99)</b>     | 0.60 (0.30, 1.19)           |
| CHD                                                   | 15.0                   | 26.6                  | <b>2.04 (1.15, 3.62)</b>     | 1.37 (0.72, 2.60)           |
| COPD                                                  | 10.5                   | 18.8                  | <b>1.96 (1.03, 3.74)</b>     | 1.66 (0.82, 3.36)           |
| Diabetes                                              | 14.1                   | 23.4                  | <b>1.87 (1.03, 3.39)</b>     | <b>2.01 (1.04, 3.88)</b>    |
| Depressed at baseline                                 | 6.4                    | 34.4                  | <b>7.61 (4.38, 13.22)</b>    | <b>5.61 (3.07, 10.25)</b>   |
| Current smoker                                        | 11.5                   | 9.4                   | 0.80 (0.34, 1.87)            | 0.62 (0.25, 1.58)           |
| Drink >12 alcoholic drinks in past 12 m               | 24.3                   | 18.8                  | 0.72 (0.38, 1.36)            | 0.88 (0.44, 1.74)           |
| Beta-blocker                                          | 15.4                   | 21.9                  | 1.54 (0.84, 2.82)            | 1.20 (0.59, 2.42)           |
| Anti-depressants                                      | 0.4                    | 1.6                   | 3.75 (0.45, 30.96)           | 1.65 (0.16, 17.44)          |
| BMI                                                   |                        |                       |                              |                             |
| Normal (18.5–<23)                                     | 37.7                   | 42.2                  | 1                            | 1                           |
| Overweight or Obese (23 or above)                     | 57.3                   | 51.6                  | 0.81 (0.48, 1.35)            | 0.67 (0.38, 1.20)           |
| Underweight (<18.5)                                   | 5.0                    | 6.3                   | 1.12 (0.38, 3.28)            | 0.93 (0.28, 3.03)           |
| Number of stressful life event >1 at year 2 follow-up | 22.1                   | 40.6                  | <b>2.41 (1.45, 4.03)</b>     | <b>2.43 (1.41, 4.20)</b>    |
|                                                       |                        |                       |                              | R <sup>2</sup> = 0.1771     |

doi:10.1371/journal.pone.0076017.t002

cantly related to at least one other medical condition, with the presence of depression associated with increased odds of all urologic and sexual symptoms. On the other hand, Laumann and colleagues [24] showed that the association of LUTS and depressive symptoms in men may also be bi-directional. While the present study has shown LUTS as a risk factor for depressive symptoms, our previous prospective study [25] has also demonstrated that depressive symptoms may increase the risk of LUTS in Chinese elderly men. Therefore, the association between LUTS and depressive symptoms may very well be reciprocal.

There are several mechanisms in which LUTS can lead to manifesting depressive symptoms in Chinese elderly men, mainly due to demoralization of having LUTS. First, in terms of

functional impact of having LUTS, LUTS can lead to depression through the feeling of bother, because the patients are discouraged of performing normal daily activities [10], and great impairment in daily activities is a strong risk factor of major depression [26–27]. For men being married or living in a married-like relationship, sexual dysfunction [28–30] can be another possible mechanism linking LUTS to depression. Second, in terms of the psychological impact of having LUTS, men with LUTS tend to be embarrassed and socially anxious about their conditions [12], and some urological patients may hold negative views toward having prostatic diseases [31]. Third, LUTS may lead to depression indirectly through sleep deprivation, as nocturia, one of the major LUTS, is associated with excessive daytime sleepiness, decreased

ability to perform tasks which need attention, as well as depression [32].

While we have added to the literature that the presence of LUTS could lead to increased risk of having clinically relevant depressive symptoms, whether treating the LUTS could result in better mood and decreased in the risk of having depressive symptoms is unknown. In a recent study, Quek and colleagues [33] have shown that medical and surgical treatments that improve patients' LUTS could also improve their overall mood symptoms including anxiety and depression. However, that study was not a randomized controlled trial and only pre- and post-intervention design was employed. Nevertheless, since the relationship between LUTS and depression may be bi-directional, as suggested together by our present and previous study [24], any intervention that may improve the LUTS situation may be beneficial to the mood of the patients, which may then feed back to improve the LUTS situation through possible suggested pathways, including decreased adrenergic tone [24], common neurotransmitter responsible for both urological and depressive symptoms [23,34], as well as the phosphodiesterase isozymes [24,35]. Further intervention studies need to be conducted to confirm this hypothesis, which can have important public health impact to the elderly suffering from both urological and psychological problems.

Our study has several limitations. First, only a screening instrument, the GDS, was used to facilitate assessment of clinically relevant depressive symptoms in older adults instead of a physician-administered psychiatric diagnostic interview. While the prevalence of depression could have been over-estimated due to the instrument's high sensitivity and specificity [36], the GDS is still useful as a quick and easy instrument to screen for depression among older adults. Second, the study sample consisted of all volunteers; as a result, it is possible that our sample is healthier than that recruited from the general population because the recruitment of subjects from community centers would generally consist of a healthier group of older adults, be it psychologically or physically when compared to that of the general population. People with severe LUTS may also find it inconvenient to take part in this study, since it requires the subjects to travel to the study

site. Third, only 2.6% of the subjects developed depressive symptoms over the 2-year follow-up period. While we are cautious with our interpretations of the results, 2.6% of all people suffering from LUTS in the population is not a small number; thus, we cannot undermine the public health relevance of our findings in a population level. Moreover, our sample has shown to be generally more educated with greater awareness of health [37]. Therefore, we are cautious with our interpretations of the results. Last, we used interviewers to conduct the IPSS questionnaires on the subjects, who may find embarrassing to disclose information on their LUTS in front of other people. However, this may be the only feasible method of administration because many older adults in Hong Kong have only attained education of the primary level or below (~60% of subjects in this study). In addition, only two subjects refused to answer questions related to LUTS; hence, it is unlikely that our results were made biased in this way.

## Conclusion

In conclusion, depression is more common in patients with moderate to severe LUTS when compared to those without. As elderly are at increased risk of depression, mental illness and suicide, men who suffer from moderate to severe LUTS may be at even higher risk. Clinicians and health care workers in both primary and urologic settings should be alert to the increased prevalence of clinically depressive symptoms in this high risk population. Due to the possible bi-directionality of the relationship between LUTS and depression, any intervention that improves the LUTS situation may also be beneficial towards reducing depressive symptoms, which may then feed back to improve the LUTS situation. The findings warrant further investigations.

## Author Contributions

Conceived and designed the experiments: RYC JCSL DCCC JW CKMW SYSW. Performed the experiments: RYC JCSL DCCC JW CKMW SYSW. Analyzed the data: RYC JCSL DCCC SYSW. Contributed reagents/materials/analysis tools: RYC JCSL DCCC JW CKMW SYSW. Wrote the paper: RYC JCSL DCCC JW CKMW SYSW.

## References

1. Whooley MA (2006) Depression and cardiovascular disease. *JAMA* 295: 2874–2881.
2. Ng TP, Niti M, Tan WC, Cao Z, Ong KC, et al. (2007) Depressive symptoms and chronic obstructive pulmonary disease: effect on mortality, hospital readmission, symptom burden, functional status, and quality of life. *Arch Intern Med* 167: 60–67.
3. Sherwood A, Blumenthal JA, Trivedi R, Johnson KS, O'Connor CM, et al. (2007) Relationship of depression to death or hospitalization in patients with heart failure. *Arch Intern Med* 167: 367–373.
4. Sundquist J, Li X, Johansson SE, Sundquist K (2005) Depression as a predictor of hospitalization due to coronary heart disease. *Am J Prev Med* 29: 428–433.
5. Bula CJ, Wietlisbach V, Burnand B, Yersin B (2001) Depressive symptoms as a predictor of a 6 month outcomes and services utilization in elderly medical inpatients. *Arch Intern Med* 161: 2609015.
6. Kirby RS (2000) The natural history of benign prostatic hyperplasia: What have we learned in the last decade? *Urology* 56: 3–6.
7. Platz EA, Smit E, Curhan GC, Nyberg LM, Giovannucci E (2002) Prevalence of and racial/ethnic variation in lower urinary tract symptoms and noncancer prostate surgery in U.S. men. *Urology* 59: 877–883.
8. Trueman P, Hood SC, Nayak US, Mrazek MF (1999) Prevalence of lower urinary tract symptoms and self-reported diagnosed "benign prostatic hyperplasia" and their effect on quality of life in a community-based survey of men in the UK. *BJU Int* 83: 410–415.
9. Bertaccini A, Vassallo F, Martino F, Luzzi L, Rocca Rossetti S, et al. (2001) Symptoms, bothersomeness and quality of life in patients with LUTS suggestive of BPH. *Eur Urol* 40: 13–18.
10. Eckhardt MD, van Venrooij GE, van Melick HH, Boon TA (2001) Prevalence and bothersomeness of lower urinary tract symptoms in benign prostatic hyperplasia and their impact on well-being. *J Urol* 166: 563–568.
11. Welch G, Weinger K, Barry MJ (2002) Quality of life impact of lower urinary tract symptom severity: results from the Health Professionals Follow-up Study. *Urology* 59: 245–250.
12. Glover L, Gannon K, McLoughlin J, Emberton M (2004) Men's experiences of having lower urinary tract symptoms: factors relating to bother. *BJU Int* 94: 563–567.
13. Engstrom G, Henningsohns L, Steniecek G, Lepper J (2005) Self-assessed health, sadness and happiness in relation to the total burden of symptoms from the lower urinary tract. *BJU Int* 95: 810–815.
14. Irwin DE, Milsom I, Kopp Z, Abrams P, Cardozo L (2006) Impact of overactive bladder symptoms on employment, social interactions and emotional well being in six European countries. *BJU Int* 97: 96–100.
15. Wong SY, Hong A, Leung J, Kwok T, Leung PC, et al. (2006) Lower urinary tract symptoms and depressive symptoms in elderly men. *J Affect Disord* 96: 83–88.
16. Wong SY, Kwok T, Woo J, Lynn H, Griffith JF, et al. (2005) Bone Mineral Density and the Risk of Peripheral Arterial Disease in men and women: Results from Mr and Ms Os, Hong Kong. *Osteoporos Int* 16: 1933–1938.
17. Chan HC (2004) The psychometric evaluation of the Chinese version of the international prostate symptom score (IPSS). [Thesis] Hong Kong: Hong Kong University.
18. Lee HB, Chiu HFK, Kwok WY, Leung CM, Kwong PK, et al. (1993) Chinese elderly and the GDS short form: a preliminary study. *Clin Geront* 14: 37–39.
19. Lau EM, Chan HH, Woo J, Lin F, Black D, et al. (1996) Normal ranges for vertebral height ratios and prevalence of vertebral fracture in Hong Kong Chinese: A comparison with American Caucasians. *J Bone Miner Res* 11: 1364–1368.
20. Washburn RA (1993) The physical activity scale for the elderly (PASE): Development and Evaluation. *J Clin Epidemiol* 46: 153–162.

21. Takao T, Tsujimura A, Okuda H, Yamamoto K, Fukuhara S, et al. Lower urinary tract symptoms and erectile dysfunction associated with depression among Japanese patients with late-onset hypogonadism symptoms. *Aging Male* 2011;14: 110–114.
22. Coyne KS, Sexton CC, Irwin DE, Kopp ZS, Kelleher CJ, et al. (2008) The impact of overactive bladder, incontinence and other lower urinary tract symptoms on quality of life, work productivity, sexuality and emotional well being in men and women: results from the EPIC study. *BJU Int* 101: 1388–1395.
23. Fitzgerald MP, Link CL, Litman HJ, Trivison TG, McKinlay JB (2007) Beyond the lower urinary tract: the association of urologic and sexual symptoms with common illnesses. *Eur Urol* 52: 407–415.
24. Laumann EO, Kang JH, Glasser DB, Rosen RC, Carson CC (2008) Lower urinary tract symptoms are associated with depressive symptoms in White, Black and Hispanic men in the United States. *J Urol* 180: 233–240.
25. Wong SY, Woo J, Leung JC, Leung PC (2010) Depressive symptoms and lifestyle factors as risk factors of lower urinary tract symptoms in Southern Chinese men: a prospective study. *Aging Male* 13: 113–119.
26. Chi I, Yip PS, Chiu HF, Chou KL, Chan KS, et al. (2005) Prevalence of depression and its correlates in Hong Kong's Chinese older adults. *Am J Geriatr Psychiatry* 13: 409–416.
27. Chou KL, Chi I (2005) Prevalence and correlates of depression in Chinese oldest-old. *Int J Geriatr Psychiatry* 20: 41–50.
28. Wong SY, Chan D, Hong A, Leung PC, Woo J (2006) Depression and lower urinary tract symptoms: Two important correlates of erectile dysfunction in middle-aged men in Hong Kong, China. *Int J Urol* 13: 1304–10.
29. Rosen RC (2004) Lower urinary tract symptoms and sexual dysfunction: additional evidence of an association. *BJU Int* 93: 689–94.
30. Araujo AB, Johannes CB, Feldman HA, Derby CA, McKinlay JB (2000) Relation between psychosocial risk factors and incidence of erectile dysfunction: prospective results from the Massachusetts male aging study. *Am J Epidemiol* 152(6): 533–41.
31. Gannon K, Glover L, O'Neill M, Emberton M (2005) Lower urinary tract symptoms in men: self perceptions and the concept of bother. *BJU Int* 96: 823–827.
32. Marschall-Kehrel D (2004) Update on nocturia: the best of rest is sleep. *Urology* 64: 21–24.
33. Quek KF, Razack AH, Chua CB, Low WY, Loh CS (2004) Effect of treating lower urinary tract symptoms on anxiety, depression and psychiatric morbidity: a one-year study. *Int J Urol* 11: 848–855.
34. Mariappan P, Ballantyne Z, N'Dow JM, Alhasso AA (2005) Serotonin and noradrenaline reuptake inhibitors (SNRI) for stress urinary incontinence in adults. *Cochrane Database Syst Rev* (3): CD004742.
35. Roehrborn CG (2004) Lower urinary tract symptoms, benign prostatic hyperplasia, erectile dysfunction, and phosphodiesterase-5 inhibitors. *Rev Urol* 6: 121–127.
36. Marc LG, Raue PJ, Bruce ML. Screening Performance of the Geriatric Depression Scale (GDS-15) in a Diverse Elderly Home Care Population (2008) *Am J Geriatr Psychiatry* 16: 914–921.
37. Wong SY, Lau WW, Leung PC, Leung JC, Woo J (2007) The association between isoflavone and lower urinary tract symptoms in elderly men. *Br J Nutr* 98: 1237–1242.
